# Supplementary material for: Antagonistic coevolution between hosts and sexually transmitted infections
Source: bioRxiv or medRxiv preprint supplement (doi:10.1101/590232), 2019-06-21
Supplement: Supplementary file [file media-1.pdf]

# Supporting information:

## Antagonistic coevolution between hosts and sexually transmitted infections

### DERIVATION OF HOST FITNESS

As described in the main text, the initial dynamics of a rare mutant host (subscript  $m$ ) in a resident population at equilibrium are given by:

$$\frac{dS_m}{dt} = b_m - \beta[S_m I^*] - dS_m + \gamma I_m \quad (S1)$$

$$\frac{dI_m}{dt} = \beta[S_m I^*] - (d + \alpha(\beta) + \gamma)I_m \quad (S2)$$

with

$$b_m = \frac{p}{N^*} (r(1 - hN^*)(m_S(g_m)S^* + f(\beta)m_I(g_m, v(\beta))I^*)(m_S(g)S_m + f(\beta)m_I(g, v(\beta))I_m)) \quad (S3)$$

corresponding to the birth rate and

$$\beta[S_m I^*] = \frac{2\beta p m_S(g)m_I(g_m, v(\beta))S_m I^*}{N^*} \quad (S4)$$

to the infection rate.

One can use the next-generation method to calculate the invasion fitness for the rare mutant (Hurford et al. 2010), which first requires deriving the Jacobian of the mutant dynamics:

$$J = \begin{pmatrix} A - \frac{2\beta p m_S(g)m_I(g_m, v(\beta))I^*}{N^*} - d & B + \gamma \\ \frac{2\beta p m_S(g)m_I(g_m, v(\beta))I^*}{N^*} & -d - \alpha(\beta) - \gamma \end{pmatrix} \quad (S5)$$

where for notational convenience:

$$A = \frac{p m_S(g)r(1 - hN^*)(m_S(g_m)S^* + f(\beta)m_I(g_m, v(\beta))I^*)}{N^*} \quad (S6)$$

$$B = \frac{p m_I(g, v(\beta))r(1 - hN^*)(m_S(g_m)S^* + f(\beta)m_I(g_m, v(\beta))I^*)}{N^*} \quad (S7)$$

SUPPORTING INFORMATION: ANTAGONISTIC COEVOLUTION BETWEEN HOSTS AND SEXUALLY TRANSMITTED INFECTIONS

Next, one must separate the Jacobian into components,  $F$  and  $V$  such that  $J = F - V$  with:

$$F = \begin{pmatrix} A & B \\ 0 & 0 \end{pmatrix} \quad (S8)$$

$$V = \begin{pmatrix} \frac{2\beta p m_S(g) m_I(g_m, v(\beta)) I^*}{N^*} + d & -\gamma \\ -\frac{2\beta p m_S(g) m_I(g_m, v(\beta)) I^*}{N^*} & d + \alpha(\beta) + \gamma \end{pmatrix} \quad (S9)$$

The next-generation matrix is given by  $N_G = FV^{-1}$ , and the invasion fitness of the rare host mutant,  $w_H(g_m, \beta)$ , is sign equivalent to the largest eigenvalue of this matrix minus 1:

$$w_H(g_m) = \frac{p r m_S^g (1 - h N^*) (2 p f_\beta m_I^{g,\beta} m_I^{g_m, v\beta} \beta I^* + \Gamma_\beta N^*) (m_S^g S^* + f_\beta m_I^{g_m, v\beta} I^*)}{N^* (2 p \beta m_S^g m_I^{g_m, v\beta} I^* (\Gamma_\beta - \gamma) + d \Gamma_\beta N^*)} - 1 \quad (S10)$$

where  $\Gamma_\beta = d + \alpha(\beta) + \gamma$ ,  $f_\beta = f(\beta)$ ,  $m_S^g = m_S(g)$  and  $m_I^{g_m, v\beta} = m_I(g, v(\beta))$ , as shown in equation 31 in the main text.

## REFERENCES

Hurford, A., D. Cownden, and T. Day. 2010. Next-generation tools for evolutionary invasion analyses. *J. R. Soc. Interface* 7:561–571.
